# Supplementary material for: Criteria for the selection of a support material to fabricate coated membranes for a life support device
Source: Royal Society of Chemistry journal article supplement (doi:10.1039/c4ra04638b), 2014-01-01
Supplement: c4ra04638b1.pdf [file c4ra04638b1.pdf]

## Electronic Supplementary Information for

# Criteria for the selection of support material to fabricate coated membranes for life support device

Yifan Yang, Dipak Rana\*, Takeshi Matsuura, Songyuan Zheng and Christopher Q. Lan

University of Ottawa, Department of Chemical and Biological Engineering, 161 Louis Pasteur Private, Ottawa, Ontario, K1N 6N5, Canada

Tel.: +1-613-562-5800 x 6085; fax: +1-613-562-5172.

E-mails: rana@uottawa.ca; rana@eng.uottawa.ca

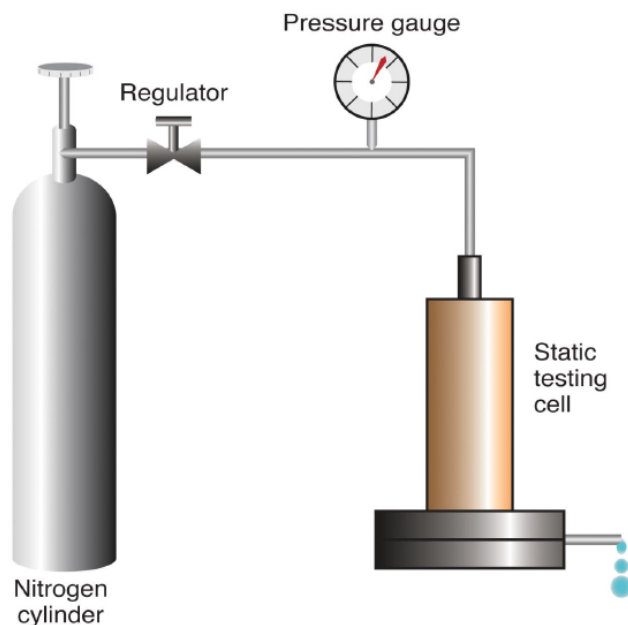

**Figure S1:** Liquid entry pressure test setup.

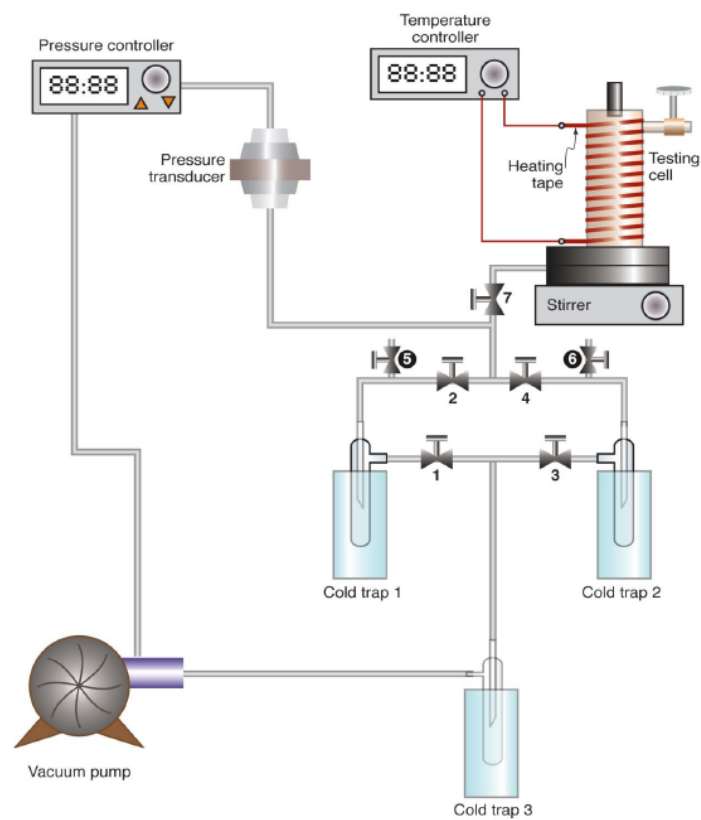

**Figure S2:** Vacuum membrane distillation experimental setup.
